# Supplementary material for: Piperlongumine Suppresses Proliferation of Human Oral Squamous Cell Carcinoma through Cell Cycle Arrest, Apoptosis and Senescence
Source: MDPI journal article supplement (doi:10.3390/ijms17040616), 2016-04-23
Supplement: s1 [file s1]

## Supplementary Materials: Piperlongumine Suppresses Proliferation of Human Oral Squamous Cell Carcinoma through Cell Cycle Arrest, Apoptosis and Senescence

San-Yuan Chen, Geng-Hung Liu, Wen-Ying Chao, Chung-Sheng Shi, Ching-Yen Lin, Yun-Ping Lim, Chieh-Hsiang Lu, Peng-Yeh Lai, Hau-Ren Chen and Ying-Ray Lee

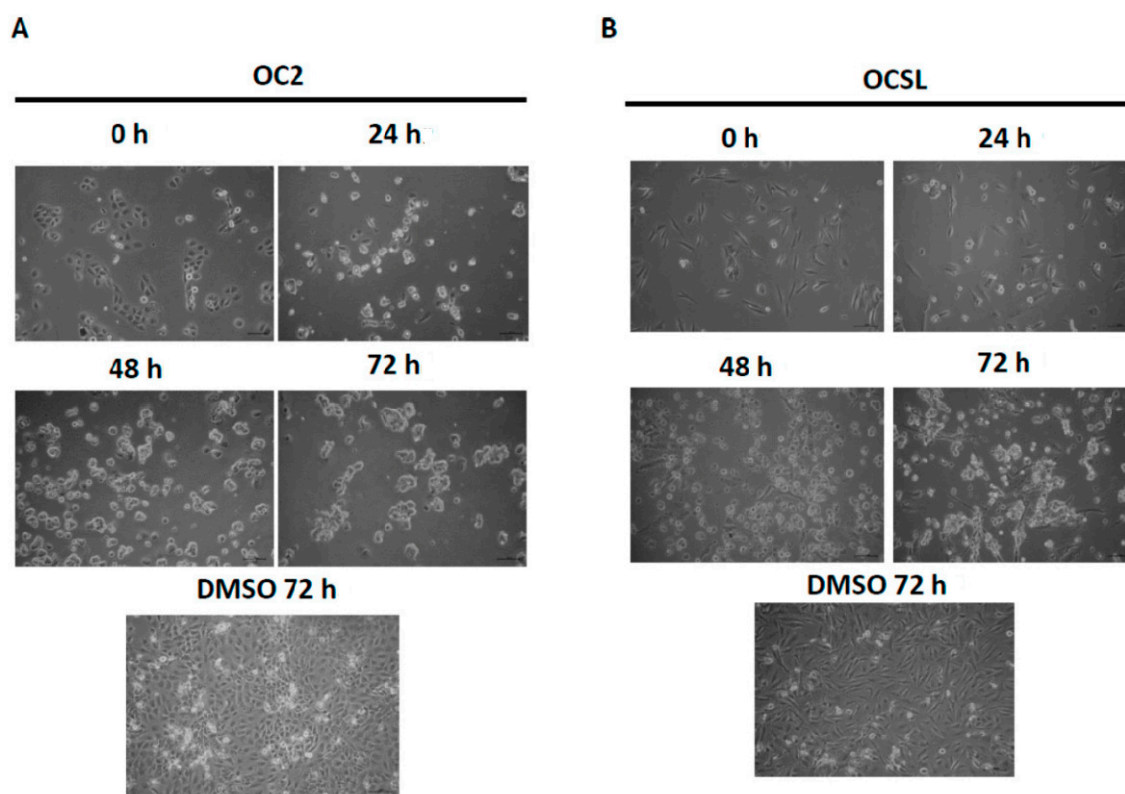

**Figure S1.** Piperlongumine treatment induced cytotoxicity, which was observed in the significant reduction of the cell number and morphological round-up instead of attachment. OC2 (A) and OCSL (B) cells were incubated with DMSO and piperlongumine (10  $\mu$ M) for various times, and the morphologic changes were observed under a microscope.

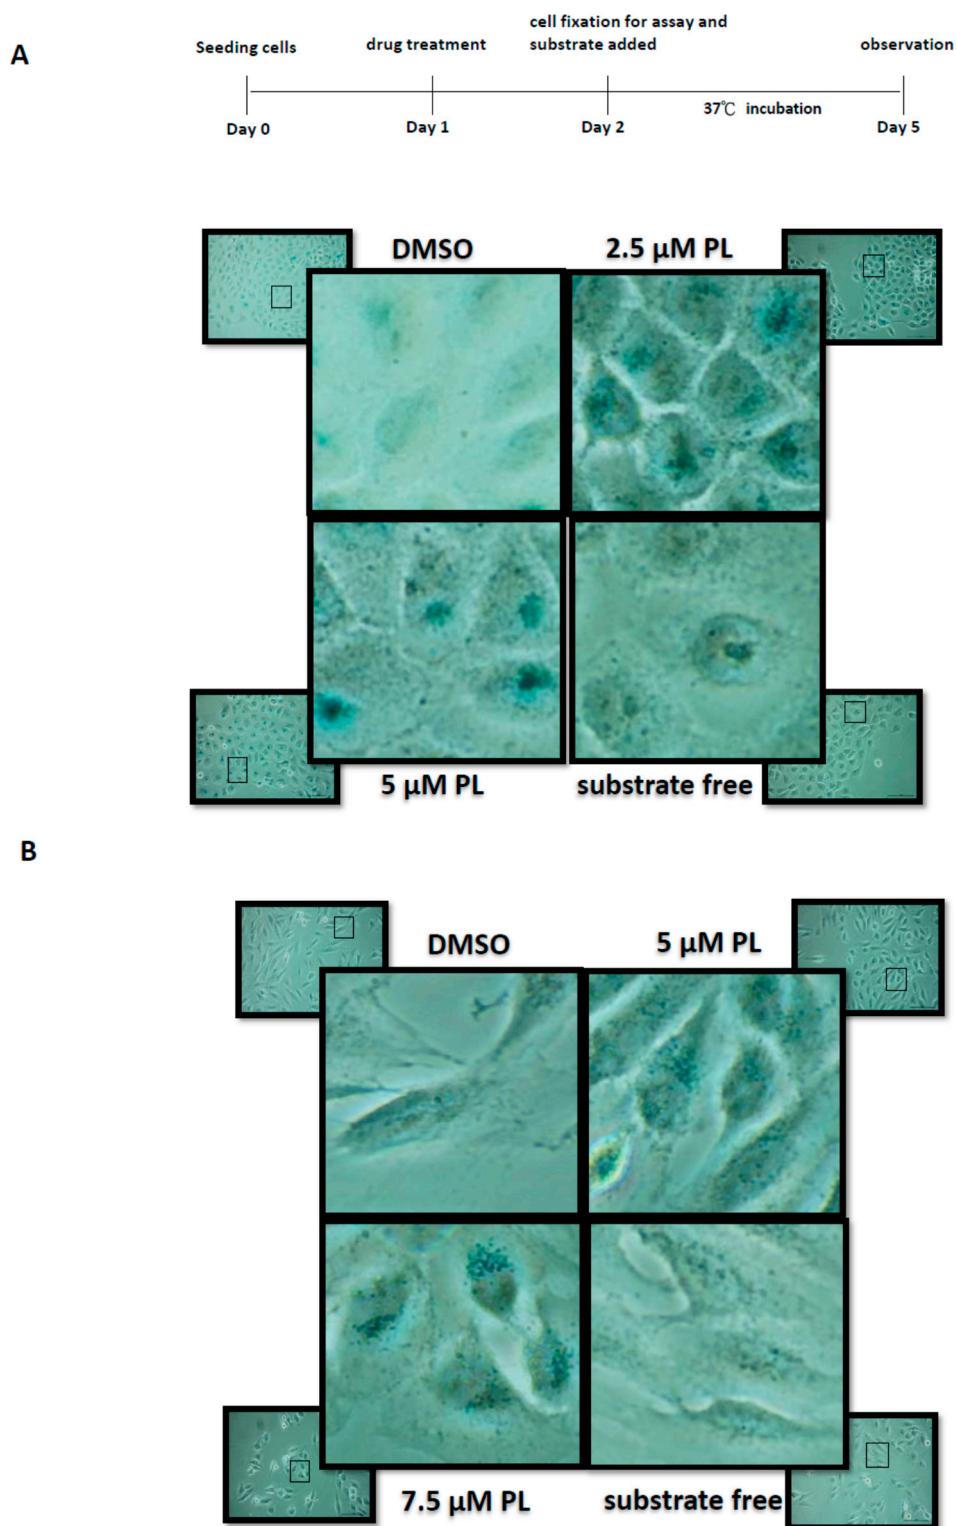

**Figure S2.** Piperlongumine induced cellular senescence in human OSCC cells. After treatment with DMSO or piperlongumine for 24 h, (A) OC2 and (B) OCSL cells were stained with SA- $\beta$ -Gal, and the senescent cells were determined under a microscope.
